# Supplementary material for: Determination of tropospheric vertical columns of NO 2 and aerosol optical properties in a rural setting using MAX-DOAS
Source: Copernicus journal article supplement (doi:10.5194/acp-11-12475-2011), 2011-12-13
Supplement: Supplementary file 1 [file acp-11-12475-2011-supplement.pdf]

# Supplementary Material: Determination of tropospheric vertical columns of NO<sub>2</sub> and aerosol optical properties in a rural setting using MAX-DOAS

J. D. Halla<sup>1</sup>, T. Wagner<sup>2</sup>, S. Beirle<sup>2</sup>, J. R. Brook<sup>3</sup>, K. L. Hayden<sup>3</sup>, J. M. O'Brien<sup>3</sup>, A. Ng<sup>4</sup>, D. Majonis<sup>1,\*</sup>, M. O. Wenig<sup>5</sup>, and R. McLaren<sup>1</sup>

<sup>1</sup>Centre for Atmospheric Chemistry, York University, Toronto, ON, Canada

<sup>2</sup>Satellite Group, Max Planck Institute for Chemistry, Mainz, Germany

<sup>3</sup>Air Quality Research Division, Environment Canada, Toronto, ON, Canada

<sup>4</sup>Ontario Ministry of the Environment, Toronto, ON, Canada

<sup>5</sup>School of Energy and Environment, City U, Hong Kong, China

\*now at: Department of Chemistry, University of Toronto, Toronto, ON, Canada

Correspondence to: R. McLaren (rmclaren@yorku.ca)

## 1 Methodology for determining $\tau$ and NO<sub>2</sub> VCDs from MAX-DOAS

The result of the MAX-DOAS retrieval (Sect. 2.2) is the DSCD:

$$\text{DSCD}_\alpha = \text{SCD}_\alpha - \text{SCD}_{90} \quad (1)$$

where  $\text{SCD}_\alpha$  and  $\text{SCD}_{90}$  are the slant column densities of measurements with  $\alpha < 90^\circ$  and  $\alpha = 90^\circ$  respectively. The DSCD represents the difference in column amount of the absorber integrated along the light path through the atmosphere and the column amount of the absorber in the  $\text{SCD}_{90}$ . It depends on the trace gas amount, elevation angle ( $\alpha$ ), solar zenith angle (SZA), and relative azimuth angle (RAZI) between the sun and the direction the telescope is pointed ( $\beta$ ).

The AMF is the average light path enhancement for solar light traveling through the atmosphere compared to a straight vertical path orthogonal to the ground (Perliski and Solomon, 1993; Solomon et al., 1987). It is defined as:

$$\text{AMF} \equiv \frac{\text{SCD}}{\text{VCD}} \quad (2)$$

Similarly, the differential air mass factor (DAMF) is defined as:

$$\text{DAMF} = \frac{\text{DSCD}}{\text{VCD}_{\text{trop}}} \quad (3)$$

15 Since the DSCD contains only tropospheric trace gas absorptions, for the calculation of the DAMF, only the tropospheric profiles of the trace gases have to be taken into account (Sinreich et al., 2005).

Expanding and rearranging Eq. (3) gives:

$$\text{VCD}_{\text{trop}} = \frac{\text{DSCD}}{\text{DAMF}} = \frac{\text{SCD}_{\alpha} - \text{SCD}_{90}}{\text{AMF}_{\alpha} - \text{AMF}_{90}} \quad (4)$$

Unfortunately the conversion from DSCD to VCD is not easy, because the accurate determination  
20 of the DAMF is often difficult.

### 1.1 Radiative transfer and inversion

In southwestern Ontario, conditions with low aerosol levels are infrequently encountered during the summer and the geometrical approximation often does not hold. Instead, a RTM was used to determine the AMFs (Hendrick et al., 2006; Wagner et al., 2007). McArtim is a backward model  
25 that calculates the photon flux at a certain location (latitude, longitude, altitude) in the atmosphere treating multiple scattering with full spherical geometry (Deutschmann et al., 2011). AMFs were calculated for  $\text{O}_4$  and  $\text{NO}_2$  from McArtim simulated radiances. Input parameters to McArtim include  $\alpha$ , SZA, RAZI, altitude, pressure, temperature, surface albedo = 0.05, single scattering albedo (SSA) = 0.95, asymmetry parameter ( $g$ , under the Henyey-Greenstein approximation = 0.68), and  
30 parameters for the absorbing trace gases.

Wagner et al. (2004) introduced the concept of using the oxygen dimer ( $\text{O}_4$ ) absorption to retrieve aerosol profiles (Frieß et al., 2006; Li et al., 2010; Wittrock et al., 2004).  $\text{O}_4$  results from the bimolecular association of  $\text{O}_2$ :

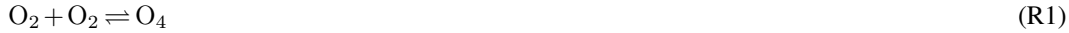

35 and is temperature and pressure dependent with a scale height of approximately 4 km. An estimated  $\text{O}_4$  VCD (expressed as the integrated quadratic  $\text{O}_2$  concentration) may be calculated if temperature and pressure vertical profiles are known. This was done for the Ridgeway site using radiosonde data from White Lake, Michigan (UWYO, 2010). The estimated  $\text{O}_4$  VCD was  $1.28 \times 10^{43}$  molecules<sup>2</sup> cm<sup>-5</sup>. This value agrees with other calculated values using similar approaches at  
40 similar elevations:  $1.30 \times 10^{43}$  molecules<sup>2</sup> cm<sup>-5</sup> (Wagner et al., 2009),  $1.26 \times 10^{43}$  molecules<sup>2</sup> cm<sup>-5</sup> (Wagner et al., 2002). Since  $\text{O}_4$  is predominantly in the lowest part of the troposphere, this is the region where  $\text{O}_4$  DSCDs are most sensitive to changes in the light path due to varying levels of aerosols. The amount of aerosol present for a given day and location also has a very large effect on the DAMFs.

#### 45 1.1.1 Aerosol optical depth ( $\tau$ )

Aerosol optical depth,  $\tau$ , is the attenuation of light due to aerosol extinction; where  $I_0$  is the original intensity of light,  $I$  the intensity after traveling a distance  $x$ , and  $E$  the aerosol extinction coefficient:

$$\frac{I}{I_0} = e^{-\tau} = e^{-Ex} \quad (5)$$

Typically  $\tau$  is defined for light traveling through a vertical column of the atmosphere from sea level to infinity (top of the atmosphere), in which  $E$  is not constant with height. In order to model conditions with varying degrees of aerosol load, an integrated aerosol optical depth is defined as:

$$\tau = \int_{0 \text{ km}}^{20 \text{ km}} E(z) dz \quad (6)$$

where  $z$  is the height above the ground (km). In the modeling performed here,  $E$  was calculated according to the following equation, as developed in Li et al. (2010):

$$E = \frac{\tau_{\text{RTM}}}{H_{\text{aer}}} \quad (7)$$

where  $\tau_{\text{RTM}}$  is the aerosol optical depth, and  $H_{\text{aer}}$  the aerosol layer height, determined by the process described by Eq. (8) below.  $H_{\text{aer}}$  is equivalent to the boundary layer if aerosols are 100% confined to the boundary layer (also see Zieger et al., 2011).

Figure 1 provides a complete scheme of the methodology used in this study. The approach used by Li et al. (2010) to determine aerosol optical depths was extended to obtain  $\text{NO}_2$  VCDs on a routine basis. A comprehensive description, sensitivity analysis, and further validation may be found in Wagner et al. (2011). McArtim was used to calculate  $\text{O}_4$  AMFs at a wavelength of 360 nm, for 50 000 photon paths. A comprehensive set of  $\text{O}_4$  DAMFs was catalogued (as a function of input parameters), and used to construct an  $\text{O}_4$  DAMF look up table ( $L_\alpha$ ). A MATLAB routine was used to minimize the difference (measured as the residual sum of squares) between  $\text{O}_4$  DAMFs in  $L_\alpha$ , as a function of  $\tau$  and  $H_{\text{aer}}$ , and  $\text{O}_4$  DAMFs found via the measured DSCDs and their corresponding  $\text{O}_4$  VCDs ( $M_\alpha$ ):

$$RSS(\tau, H_{\text{aer}}) = \sum_{\alpha=2^\circ}^{30^\circ} [M_\alpha - L_\alpha(\tau, H_{\text{aer}})]^2 \quad (8)$$

The results of the minimization yield  $\text{O}_4$  DAMF,  $\tau$ , and  $H_{\text{aer}}$  values that may be used to describe the aerosol conditions for each cloud-free measurement series.

### 1.1.2 $\text{NO}_2$ vertical column densities

In addition to the dependence on the aerosol profile,  $\text{NO}_2$  DAMFs are also a function of the vertical concentration profile of  $\text{NO}_2$ . Under the assumption of a horizontally homogeneous trace gas distribution, the atmosphere may be divided vertically into several layers of height,  $h$ . Each “box” will have its own DAMF, as follows:

$$\text{DAMF}_{\text{box}_i} = \frac{d\text{DSCD}_i}{d\text{VCD}_i} \quad (9)$$

where  $d\text{DSCD}_i$  is the partial DSCD, and  $d\text{VCD}_i$  is the partial VCD for  $\text{box}_i$ . Total DAMFs, from 0 m a.g.l. to the top of the atmosphere (TOA) are:

$$\text{DAMF}_{\text{total}} = \frac{\sum_0^{\text{TOA}} \text{DAMF}_{\text{box}_i} \cdot \text{VCD}_i}{\sum_0^{\text{TOA}} \text{VCD}_i} \quad (10)$$

80 McArtim was used to calculate  $\text{NO}_2$   $\text{DAMF}_{\text{box}}$  values at 413 nm (within the DOAS fit range) using  
 50 000 photons for  $\text{NO}_2$ . These  $\text{DAMF}_{\text{box}}$  values were catalogued in a  $\text{DAMF}_{\text{box}}$  look up table. A  
 MATLAB routine selects the appropriate subset of  $\text{DAMF}_{\text{box}}$  from the look up table, based on the  
 aerosol scenario previously determined (Eq. 8). In order to minimize the effect of stratospheric  $\text{NO}_2$ ,  
 $\text{NO}_2$   $\text{DSCD}_{\text{meas}}$  ratios were prepared by taking individually measured  $\text{SCD}_\alpha$  values ( $\alpha \leq 30^\circ$ ) and  
 85 subtracting from them the  $\text{SCD}_{90}$  for a given series, then dividing each  $\text{DSCD}_\alpha$  by the  $\text{DSCD}_{10}$ .  
 These  $\text{DSCD}_{\text{meas}}$  ratios ( $M_\alpha$ ) were then compared to their corresponding  $\text{NO}_2$   $\text{DAMF}_{\text{total}}$  ratios  
 ( $L_\alpha$ ). The quality of this fit may again be expressed by the RSS:

$$RSS(H_{\text{gas}}) = \sum_{\alpha=2^\circ}^{30^\circ} [M_\alpha - L_\alpha(H_{\text{gas}})]^2 \quad (11)$$

The “best fit” between the  $\text{DSCD}_{\text{meas}}$  ratios and the  $\text{DAMF}_{\text{total}}$  ratios gives the  $\text{NO}_2$  layer height,  
 90  $H_{\text{gas}}$ , and the  $\text{NO}_2$   $\text{DAMF}$  for a given measurement series as well as the  $\text{NO}_2$   $\text{VCD}_\alpha$  values via the  
 following equation:

$$\text{VCD}_\alpha = \frac{\text{DSCD}_{\text{meas}}}{\text{DAMF}_{\text{total}}} = \frac{\text{SCD}_{\text{meas}}(\alpha) - \text{SCD}_{\text{meas}}(90^\circ)}{\text{AMF}_{\text{total}}(H_{\text{gas}}, \alpha) - \text{AMF}_{\text{total}}(H_{\text{gas}}, 90^\circ)} \quad (12)$$

Average  $\text{NO}_2$  VCDs (henceforth called  $\text{VCD}_{\text{RTM}}$ ) were calculated for each series:

$$\text{VCD}_{\text{RTM}} = \text{VCD}_{\text{avg}} = \overline{\text{VCD}}_{(2^\circ, 4^\circ, 6^\circ, 10^\circ, 30^\circ)} \quad (13)$$

95 This inversion was performed for all complete elevation sequences with  $\text{SZA} < 80^\circ$ .  $\text{NO}_2$  sequences  
 with deviations of more than  $2 \times \text{DSCD}_\alpha$  between DSCDs for subsequent elevation angles were  
 skipped. In case of a non-convergent fit, the inversion results were not defined. It should also be  
 noted that the wavelength of the  $\text{NO}_2$  inversion differs from that of the aerosol inversion. Thus, the  
 aerosol scenarios determined in the first step of the inversion might not be fully appropriate for the  
 100  $\text{NO}_2$  measurements. To estimate the systematic error of our procedure, we applied the  $\text{NO}_2$  profile  
 retrieval with aerosol profiles scaled to 0.8. These new  $\text{NO}_2$  VCDs showed only slight differences  
 (on average  $< 1\%$ ) from the original values. Finally, for both aerosol and VCD retrievals, the RSS  
 values determined, as shown in Equations 8 and 11, may be used to assess the quality of the fits.  
 RSS values  $< 0.25$  were deemed good fits for both  $\tau_{\text{RTM}}$  and  $\text{VCD}_{\text{RTM}}$ . RSS values between 0.25  
 105 and 2.5 are more uncertain, while RSS values  $> 2.5$  were considered highly uncertain and removed  
 from the data set.

## 2 The geometrical approximation

Using a simple geometrical consideration, the AMF for an absorbing gas may be approximated if  
 the trace gas layer is located below the scattering altitude:

$$110 \quad \text{AMF}_{\text{GEO}} = \frac{1}{\sin \alpha} \quad (14)$$

Conveniently a DSCD measured at 30° then equals the geometric VCD:

$$\text{VCD}_{\text{GEO}} = \frac{\text{DSCD}}{\text{DAMF}_{\text{GEO}}} = \frac{\text{DSCD}_{30}}{\frac{1}{\sin(30^\circ)} - \frac{1}{\sin(90^\circ)}} = \frac{\text{DSCD}_{30}}{2-1} = \text{DSCD}_{30} \quad (15)$$

This geometrical approximation assumes that the stratospheric absorption is similar in the horizontal-viewing and zenith directions (essentially canceling each other out). If there is a large amount of  
115 aerosol present, and hence a high degree of Mie scattering, this approximation becomes inaccurate. In most cases a RTM must be employed to obtain an accurate AMF (Hendrick et al., 2006; Wagner et al., 2007). In general, this approximation would only hold under clear sky and low aerosol conditions. For this study, geometrically approximated VCDs were determined using NO<sub>2</sub> DSCDs at both 30° and 10°. If a pair of geometric VCDs at these elevation angles in the same measurement series  
120 agreed to within 15%, then the VCD<sub>GEO</sub>, as defined in Eq. (15), was retained. This criterion ensures that the geometrical approximation is valid, and eliminates measurement points greatly affected by horizontal inhomogeneities, aerosols, or clouds (Brinksma et al., 2008; Celarier et al., 2008).

### 3 References

Brinksma, E. J., Pinardi, G., Volten, H., Braak, R., Richter, A., Schoenhardt, A., van Roozendael, M., Fayt, C., Hermans, C., Dirksen, R. J., Vlemmix, T., Berkhout, A. J. C., Swart, D. P. J., Oetjen, H., Wittrock, F., Wagner, T., Ibrahim, O. W., de Leeuw, G., Moerman, M., Curier, R. L., Celarier, E. A., Cede, A., Knap, W. H., Veefkind, J. P., Eskes, H. J., Allaart, M., Rothe, R., Piters, A. J. M., and Levelt, P. F.: The 2005 and 2006 DANDELIONS NO<sub>2</sub> and aerosol intercomparison campaigns, *J. Geophys. Res.-Atmos.*, 113, D16S46,  
130 <http://dx.doi.org/10.1029/2007JD008808>doi:10.1029/2007JD008808, 2008.

Celarier, E. A., Brinksma, E. J., Gleason, J. F., Veefkind, J. P., Cede, A., Herman, J. R., Ionov, D., Goutail, F., Pommereau, J. P., Lambert, J. C., Roozendael, M. V., Pinardi, G., Wittrock, F., Schoenhardt, A., Richter, A., Ibrahim, O. W., Wagner, T., Bojkov, B., Mount, G., Spinei, E., Chen, C. M.,  
135 Pongetti, T. J., Sander, S. P., Bucsel, E. J., Wenig, M. O., Swart, D. P. J., Volten, H., Kroon, M., and Levelt, P. F.: Validation of ozone monitoring instrument nitrogen dioxide columns, *J. Geophys. Res.-Atmos.*, 113, D15S15, <http://dx.doi.org/10.1029/2007JD008908>doi:10.1029/2007JD008908, 2008.

140 Deutschmann, T., Beirle, S., Frieß, U., Grzegorski, M., Kern, C., Kritzen, L., Platt, U., Prados-Román, C., Puķīte, J., Wagner, T., Werner, B., and Pfeilsticker, K.: The Monte carlo Atmospheric radiative transfer model McArtim: Introduction and validation of Jacobians and 3-D features, *J. Quant. Spectrosc.Ra.*, 112, 1119–1137, 2011.

- 145 Frieß, U., Monks, P. S., Remedios, J. J., Rozanov, A., Sinreich, R., Wagner, T., and Platt, U.: MAX-DOAS O<sub>4</sub> measurements: A new technique to derive information on atmospheric aerosols: 2. Modeling studies, *J. Geophys. Res.-Atmos.*, 111, D14203, <http://dx.doi.org/10.1029/2005JD006618>doi:10.1029/2005JD006618, 2006.
- 150 Hendrick, F., Van Roozendaal, M., Kylling, A., Petritoli, A., Rozanov, A., Sanghavi, S., Schofield, R., von Friedeburg, C., Wagner, T., Wittrock, F., Fonteyn, D., and De Mazière, M.: Inter-comparison exercise between different radiative transfer models used for the interpretation of ground-based zenith-sky and multi-axis DOAS observations, *Atmos. Chem. Phys.*, 6, 93–108, <http://dx.doi.org/10.5194/acp-6-93-2006>doi:10.5194/acp-6-93-2006, 2006.
- 155
- Li, X., Brauers, T., Shao, M., Garland, R. M., Wagner, T., Deutschmann, T., and Wahner, A.: MAX-DOAS measurements in southern China: retrieval of aerosol extinctions and validation using ground-based in-situ data, *Atmos. Chem. Phys.*, 10, 2079–2089, <http://dx.doi.org/10.5194/acp-10-2079-2010>doi:10.5194/acp-10-2079-2010, 2010.
- 160
- Perliski, L. M. and Solomon, S.: On the Evaluation of Air-Mass Factors for Atmospheric Near-Ultraviolet and Visible Absorption-Spectroscopy, *J. Geophys. Res.-Atmos.*, 98, 10363–10374, 1993.
- Sinreich, R., Frieß, U., Wagner, T., and Platt, U.: Multi axis differential optical absorption spectroscopy (MAX-DOAS) of gas and aerosol distributions, *Faraday Discuss.*, 130, 153–164, 2005.
- 165
- Solomon, S., Schmeltekopf, A. L., and Sanders, R. W.: On the Interpretation of Zenith Sky Absorption Measurements, *J. Geophys. Res.*, 92, 8311–8319, 1987.
- 170
- UWYO: University of Wyoming (UWYO), College of Engineering, Department of Atmospheric Science Atmospheric Soundings, available at: <http://weather.uwyo.edu/upperair/sounding.html>, 2010.
- 175 Wagner, T., von Friedeburg, C., Wenig, M., Otten, C., and Platt, U.: UV-visible observations of atmospheric O<sub>4</sub> absorptions using direct moonlight and zenith-scattered sunlight for clear-sky and cloudy sky conditions, *J. Geophys. Res.-Atmos.*, 107, 4424, <http://dx.doi.org/10.1029/2001JD001026>doi:10.1029/2001JD001026, 2002.

180 Wagner, T., Dix, B., von Friedeburg, C., Friess, U., Sanghavi, S., Sinreich, R., and Platt, U.: MAX-DOAS O<sub>4</sub> measurements: A new technique to derive information on atmospheric aerosols – Principles and information content, *J. Geophys. Res.-Atmos.*, 109, D22205, <http://dx.doi.org/10.1029/2004JD004904>doi:10.1029/2004JD004904, 2004.

185 Wagner, T., Burrows, J. P., Deutschmann, T., Dix, B., von Friedeburg, C., Frieß, U., Hendrick, F., Heue, K.-P., Irie, H., Iwabuchi, H., Kanaya, Y., Keller, J., McLinden, C. A., Oetjen, H., Palazzi, E., Petritoli, A., Platt, U., Postylyakov, O., Pukite, J., Richter, A., van Roozendaal, M., Rozanov, A., Rozanov, V., Sinreich, R., Sanghavi, S., and Wittrock, F.: Comparison of box-air-mass-factors and radiances for Multiple-Axis Differential Optical Absorption Spectroscopy (MAX-DOAS) geometries calculated from different UV/visible radiative transfer models, *Atmos. Chem. Phys.*, 7, 1809–1833, <http://dx.doi.org/10.5194/acp-7-1809-2007>doi:10.5194/acp-7-1809-2007, 2007.

Wagner, T., Deutschmann, T., and Platt, U.: Determination of aerosol properties from MAX-DOAS observations of the Ring effect, *Atmos. Meas. Tech.*, 2, 495–512, <http://dx.doi.org/10.5194/amt-2-495-2009>doi:10.5194/amt-2-495-2009, 2009.

Wagner, T., Beirle, S., Brauers, T., Deutschmann, T., Frieß, U., Hak, C., Halla, J.D., Heue, K. P., Junkermann, W., Li, X., Platt, U., and Pundt-Gruber, I.: Inversion of tropospheric profiles of aerosol extinction and HCHO and NO<sub>2</sub> concentrations from MAX-DOAS observations in Milano in summer 2003 and comparison with independent data sets, *Atmos. Meas. Tech. Discuss.*, 4, 3891–3964, 2011.

Wittrock, F., Oetjen, H., Richter, A., Fietkau, S., Medeke, T., Rozanov, A., and Burrows, J. P.: MAX-DOAS measurements of atmospheric trace gases in Ny-Ålesund – Radiative transfer studies and their application, *Atmos. Chem. Phys.*, 4, 955–966, <http://dx.doi.org/10.5194/acp-4-955-2004>doi:10.5194/acp-4-955-2004, 2004.

Zieger, P., Weingartner, E., Henzing, J., Moerman, M., de Leeuw, G., Mikkilä, J., Ehn, M., Petäjä, T., Clémer, K., van Roozendaal, M., Yilmaz, S., Frieß, U., Irie, H., Wagner, T., Shaiganfar, R., Beirle, S., Apituley, A., Wilson, K., and Baltensperger, U.: Comparison of ambient aerosol extinction coefficients obtained from in-situ, MAX-DOAS and LIDAR measurements at Cabauw, *Atmos. Chem. Phys.*, 11, 2603–2624, <http://dx.doi.org/10.5194/acp-11-2603-2011>doi:10.5194/acp-11-2603-2011, 2011.

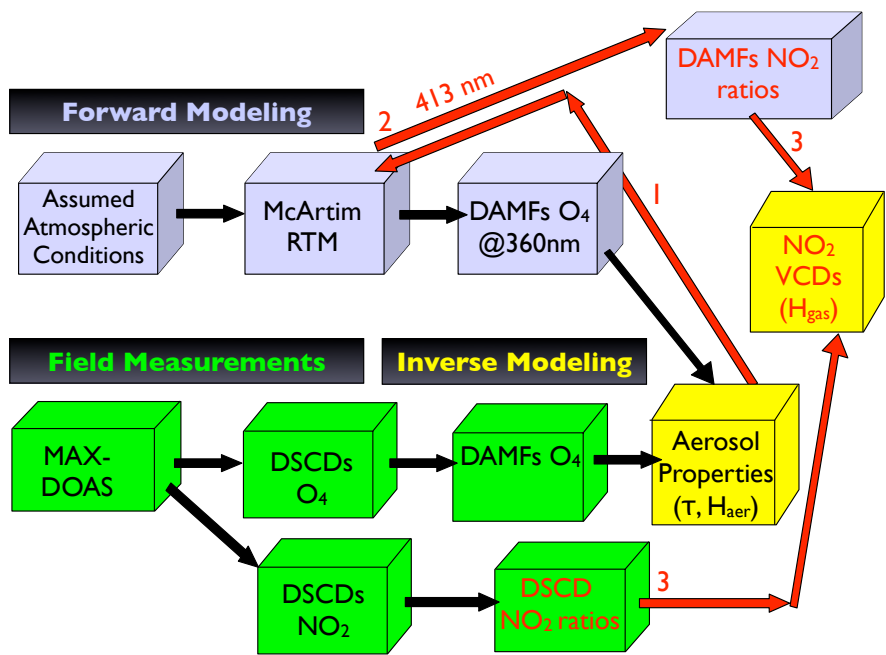

**Fig. 1.** Flowchart of methodology for determination of NO<sub>2</sub> VCDs and aerosol properties from MAX-DOAS measurements, RTM and inverse modeling. Measurements in green boxes represent products obtained from direct MAX-DOAS measurements in the field, while parameters and products shown in the grey boxes represent modeled quantities and results only. The quantities in the yellow boxes are obtained from inverse modeling.
